# Supplementary material for: Hyperlipasemia in critically ill dogs with and without acute pancreatitis: Prevalence, underlying diseases, predictors, and outcome
Source: PubMed Central journal article supplement — J Vet Intern Med. 2020 Sep 18;34(6):2319–29. doi: 10.1111/jvim.15902 (PMC7694860; doi:10.1111/jvim.15902), 2020-09-18
Supplement: JVIM-34-2319-s001.pdf [file JVIM-34-2319-s001.pdf]

**Supplemental Table 1:** Laboratory data from 1,360 critically ill dogs with DGGR-lipase activities at admission within 3x (NL group) and above 3x (HL group) the upper reference limit.

| <b>Parameter</b>                              | <b>n</b> | <b>All dogs</b>   | <b>NL group</b>  | <b>HL group</b>   | <b>P value</b> |
|-----------------------------------------------|----------|-------------------|------------------|-------------------|----------------|
| Albumin, median (IQR), g/dL [RI: 3.0-4.1]     | 1,358    | 2.86 (2.41–3.3)   | 2.89 (2.45–3.32) | 2.7 (2.23–3.14)   | <.001          |
| ALT, median (IQR), U/L [RI: 26-126]           | 1,354    | 53 (33–108)       | 51 (32–98)       | 62 (40–161)       | <.001          |
| ALP, median (IQR), U/L [RI: 9-132]            | 1,355    | 98 (50–193)       | 93 (49–177)      | 138 (64–314)      | <.001          |
| Bilirubin, median (IQR), mg/dL [RI: 0-0.2]    | 1,356    | 0.1 (0.1–0.2)     | 0.1 (0.1–0.2)    | 0.2 (0.1–0.3)     | <.001          |
| Creatinine, median (IQR), mg/dL [RI: 0.6-1.3] | 1,358    | 0.7 (0.6–1.1)     | 0.7 (0.6–1.0)    | 0.9 (0.6–2.5)     | <.001          |
| CRP, median (IQR), mg/L [RI: 0-10.7]          | 1,358    | 53.3 (11.3–121.1) | 53.6 (11.2–122)  | 49.5 (11.6–117.4) | .471           |
| gGT, median (IQR), U/L [RI: 0-7]              | 1,353    | 4 (2–7)           | 4 (2–6)          | 5 (2–11)          | <.001          |
| GLDH, median (IQR), U/L [RI: 2-10]            | 1,349    | 5 (2–11)          | 4 (2–10)         | 7 (3–20)          | <.001          |
| Hematocrit, median (IQR), % [RI: 39-57]       | 1,312    | 42 (35–49)        | 43 (36–50)       | 40 (31–47)        | <.001          |

ALT, alanine aminotransferase; ALP, alkaline phosphatase; CRP, C-reactive protein; gGT, gamma glutamyl transferase; GLDH, glutamate dehydrogenase

**Supplemental Table 2:** Primary disorders categorized as "others" in Figure 2 in 1,360 critically ill dogs with DGGR-lipase measured at admission (medical conditions with only 1 case each not included)

| <b>Medical condition</b> | <b>n</b> | <b>Medical condition</b>       | <b>n</b> | <b>Medical condition</b> | <b>n</b> |
|--------------------------|----------|--------------------------------|----------|--------------------------|----------|
| Open                     | 16       | Leishmaniasis                  | 5        | Endocarditis             | 2        |
| Snake bite envenomation  | 11       | Pyothorax                      | 4        | Fungal rhinitis          | 2        |
| Fever of unknown origin  | 9        | Sepsis/SIRS                    | 4        | Perineal hernia          | 2        |
| Megaesophagus            | 6        | Heatstroke                     | 3        | Splenic torsion          | 2        |
| Septic peritonitis       | 6        | Hypoglycemia of Toy breed dogs | 3        | Splenic thrombosis       | 2        |
| Vestibular syndrome      | 6        | Vasculitis                     | 3        | Tetanus                  | 2        |

**Supplemental Table 3:** Laboratory data associated with nonsignificant (NIL) and significant (SIL) increases in DGGR-lipase activities during hospitalization in 345 critically ill dogs

| <b>Parameter</b>                              | <b>n</b> | <b>All dogs</b>  | <b>NIL group</b> | <b>SIL group</b> | <b>P value</b> |
|-----------------------------------------------|----------|------------------|------------------|------------------|----------------|
| Number of dogs                                | 345      | 345              | 267              | 78               |                |
| Albumin, median (IQR), g/dL [RI: 3.0-4.1]     | 329      | 2.55 (2.06–2.94) | 2.57 (2.06–2.96) | 2.43 (2.07–2.90) | .431           |
| ALT, median (IQR), U/L [RI: 26-126]           | 319      | 74 (43–170)      | 75 (43–176)      | 74 (48–145)      | .910           |
| ALP, median (IQR), U/L [RI: 9-132]            | 319      | 172 (90–404)     | 177 (93–377)     | 167 (77–454)     | .981           |
| Bilirubin, median (IQR), mg/dL [RI: 0-0.2]    | 322      | 0.2 (0.1–0.4)    | 0.2 (0.1–0.3)    | 0.2 (0.1–1.3)    | <.001          |
| Creatinine, median (IQR), mg/dL [RI: 0.6-1.3] | 328      | 0.8 (0.5–1.3)    | 0.7 (0.5–1.0)    | 1.7 (0.6–6.0)    | <.001          |
| CRP, median (IQR), mg/L [RI: 0-10.7]          | 323      | 47.2 (17.8–86.9) | 47.7 (18.6–84.8) | 41.8 (16.0–90.4) | .741           |
| gGT, median (IQR), U/L [RI: 0-7]              | 319      | 5 (3–13)         | 5 (3–14)         | 5 (3-12)         | .722           |
| GLDH, median (IQR), U/L [RI: 2-10]            | 319      | 10 (4–24)        | 9 (4–24)         | 10 (4–24)        | .847           |
| Hematocrit, median (IQR), % [RI: 39-57]       | 267      | 36 (28–43)       | 38 (30–44)       | 30 (23–35)       | <.001          |

ALT, alanine aminotransferase; ALP, alkaline phosphatase; CRP, C-reactive protein; gGT, gamma glutamyl transferase; GLDH, glutamate dehydrogenase

**Supplemental Table 4:** Primary disorders categorized as "others" in Figure 3, in 345 critically ill dogs with repeated DGGR-Lipase measurements (medical conditions with only 1 case each not included)

| <b>Medical condition</b>  | <b>n</b> | <b>Medical condition</b> | <b>n</b> | <b>Medical condition</b> | <b>n</b> |
|---------------------------|----------|--------------------------|----------|--------------------------|----------|
| Intoxication              | 8        | Head trauma              | 3        | Heat stroke              | 2        |
| Snake bite envenomation   | 6        | Heart failure            | 3        | Leishmaniasis            | 2        |
| Gastric Dilation Volvulus | 5        | Open                     | 3        | Sepsis/SIRS              | 2        |
| (Broncho)pneumonia        | 4        | Angiostrongylosis        | 2        | Splenic thrombosis       | 2        |
| Fever of unknown origin   | 3        | Gastric perforation      | 2        | Wound infection/Abscess  | 2        |
